# Supplementary material for: ER-localized Shr3 is a selective co-translational folding chaperone necessary for amino acid permease biogenesis
Source: PubMed Central journal article supplement — J Cell Biol. 2023 Jul 21;222(9):e202208060. doi: 10.1083/jcb.202208060 (PMC10359922; doi:10.1083/jcb.202208060), 2023-07-21

# RAW S6Fig Gap1-8&10TM co-IP with Shr3-GFP

## Raw data - blots with 3 biological replicates

Blots to establish validity of specific interactions between Shr3-GFP and gap1-8TM-Cub-GST-6xHA and gap1-10TM-Cub-GST-6xHA  
 Replicates 2 used to prepare S6Fig.

developed with  $\alpha$ -HA  
 biological replicate 1

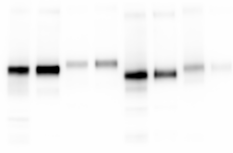

biological replicate 2

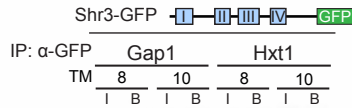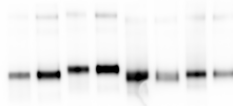

biological replicate 3

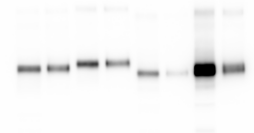

developed with  $\alpha$ -GFP  
 biological replicate 1

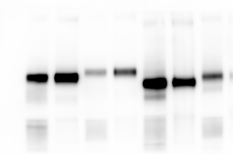

biological replicate 2

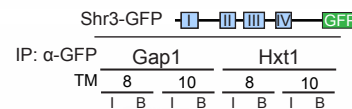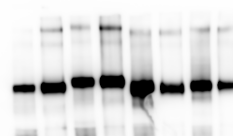

biological replicate 3

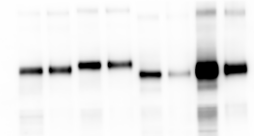

developed with  $\alpha$ -Dpm1  
 biological replicate 1

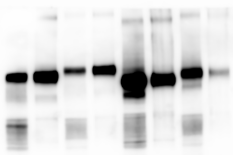

biological replicate 2

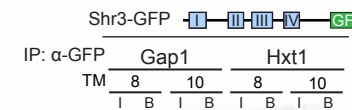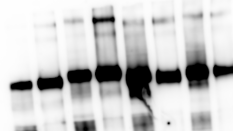

biological replicate 3

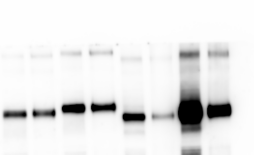

Blots showing only the Input lanes of the above used lysates

developed with  $\alpha$ -GFP

biological replicate 1 2 3

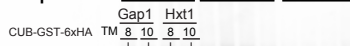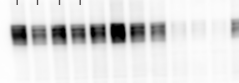

developed with  $\alpha$ -Dpm1

1 2 3

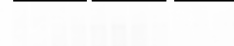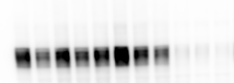

Supplement: JCB_202208060_SourceDataFS6.pdf [file JCB_202208060_SourceDataFS6.pdf]
