# Supplementary material for: ER-localized Shr3 is a selective co-translational folding chaperone necessary for amino acid permease biogenesis
Source: PubMed Central journal article supplement — J Cell Biol. 2023 Jul 21;222(9):e202208060. doi: 10.1083/jcb.202208060 (PMC10359922; doi:10.1083/jcb.202208060), 2023-07-21

# Raw1

Raw data - 4 blots (bn1-4) with 3 biological replicates to examine steady-state levels of Shr3, shr3-35, shr3-50 and shr3-76. Blots were developed with polyclonal rabbit  $\alpha$ -Shr3 (Kota and Ljungdahl, 2005) and with  $\alpha$ -Pgk1. Quantitative data plotted in lower panel Fig. 1B

Fig. 1B

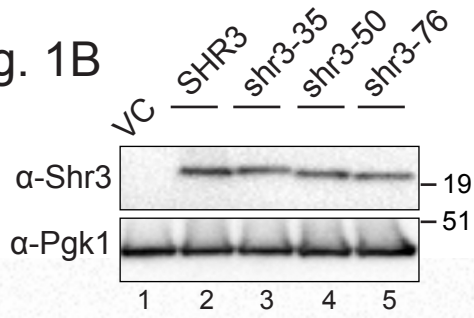

replicate 2 from bn1 and bn3 used to prepare Fig 1B

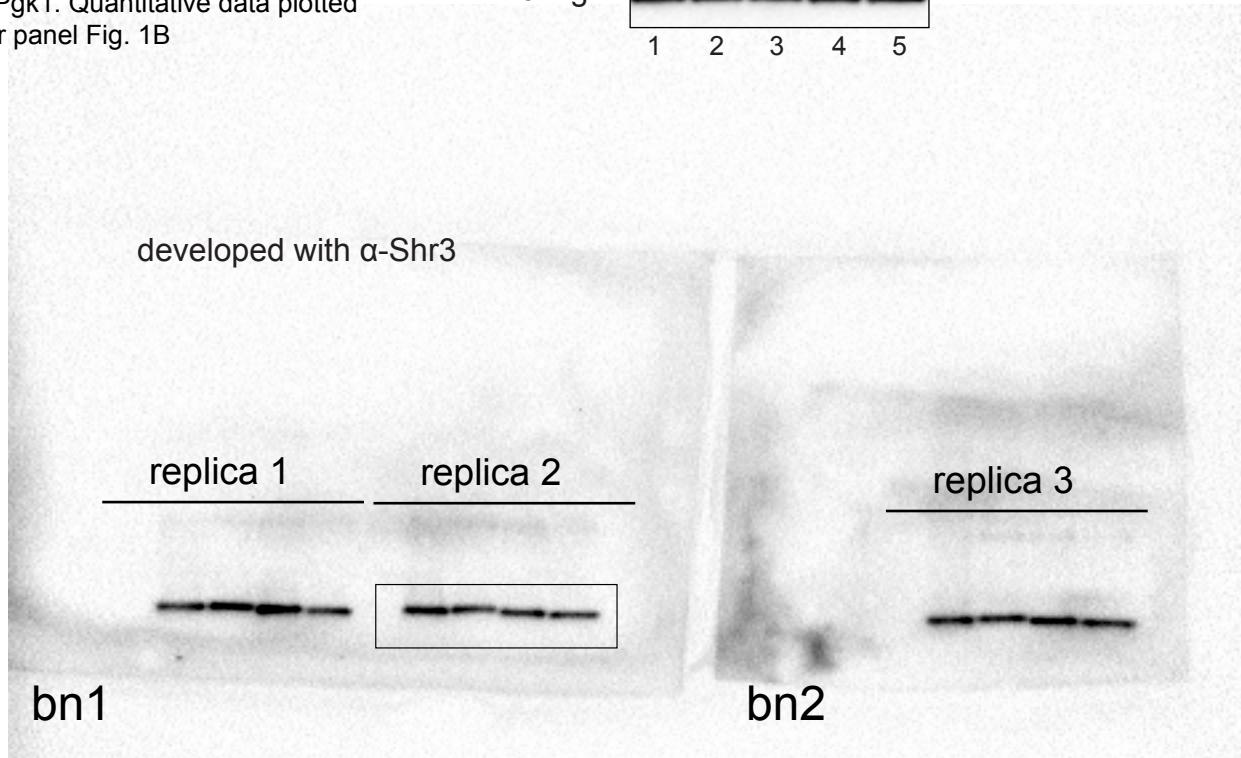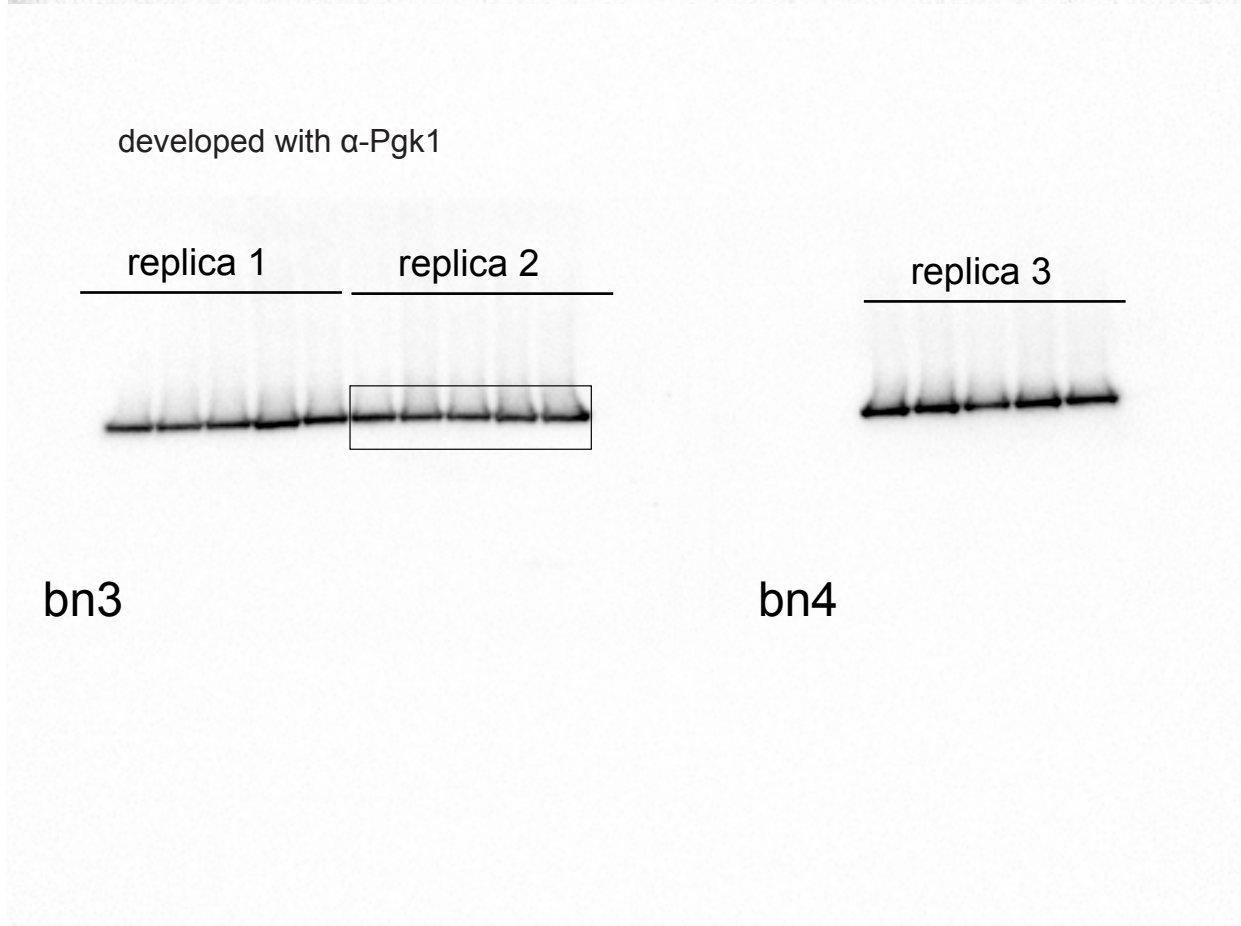

Supplement: JCB_202208060_SourceDataF1.pdf [file JCB_202208060_SourceDataF1.pdf]
