# Supplementary material for: ER-localized Shr3 is a selective co-translational folding chaperone necessary for amino acid permease biogenesis
Source: PubMed Central journal article supplement — J Cell Biol. 2023 Jul 21;222(9):e202208060. doi: 10.1083/jcb.202208060 (PMC10359922; doi:10.1083/jcb.202208060), 2023-07-21
Supplement: JCB_202208060_SourceDataF2.pdf [file JCB_202208060_SourceDataF2.pdf]

# Raw2

Raw data - 3 blots (bn5-7) with 3 biological replicates to examine steady-state levels of Shr3, shr3Δ90, shr3Δ91, shr3Δ92, shr3Δ93 and shr3Δ94. Blots were developed with polyclonal rabbit α-Shr3 (Kota and Ljungdahl, 2005) and with α-Dpm1. Quantitative data plotted in lower panel Fig. 2C.

Fig. 2C

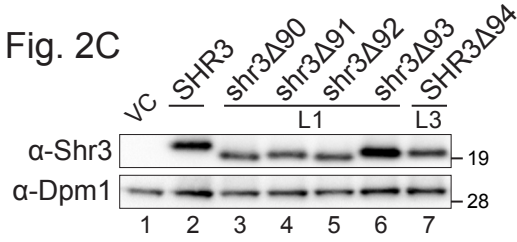

replicate 3 from bn6 and bn7 were used to prepare Fig 2c

bn5 developed with α-Shr3 and α-Dpm1

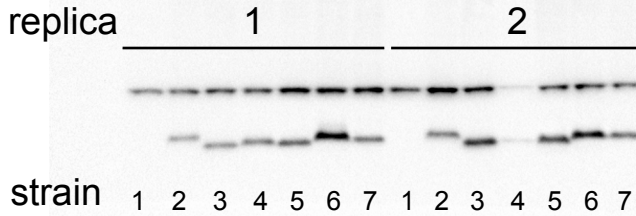

bn6 developed with α-Shr3

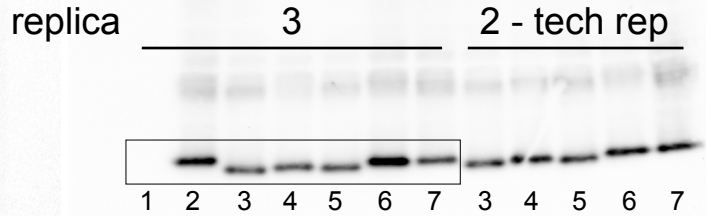

bn5

bn6

bn7 developed with α-Shr3 and reprobred with α-Dpm1

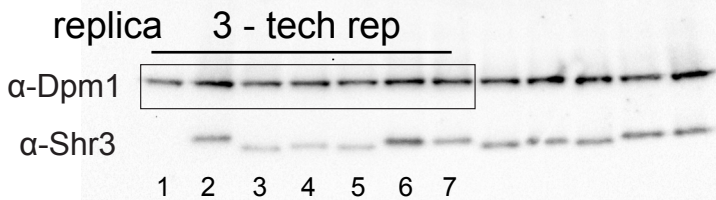

- 1 VC
- 2 SHR3
- 3 shr3Δ90
- 4 shr3Δ91
- 5 shr3Δ92
- 6 shr3Δ93
- 7 shr3Δ94

bn7
