# Supplementary material for: ER-localized Shr3 is a selective co-translational folding chaperone necessary for amino acid permease biogenesis
Source: PubMed Central journal article supplement — J Cell Biol. 2023 Jul 21;222(9):e202208060. doi: 10.1083/jcb.202208060 (PMC10359922; doi:10.1083/jcb.202208060), 2023-07-21
Supplement: JCB_202208060_SourceDataF3.pdf [file JCB_202208060_SourceDataF3.pdf]

# Raw3

Fig. 3C

Raw data - 3 blots (bn8-10) with 3 biological replicates to assess function of Shr3, shr3-35, shr3-50, shr3-76 and Shr3 $\Delta$ 94 proteins. Leucine-induce cleavage of Stp1 provides a functional output. Blots were developed with  $\alpha$ -myc. Fig. 3C.

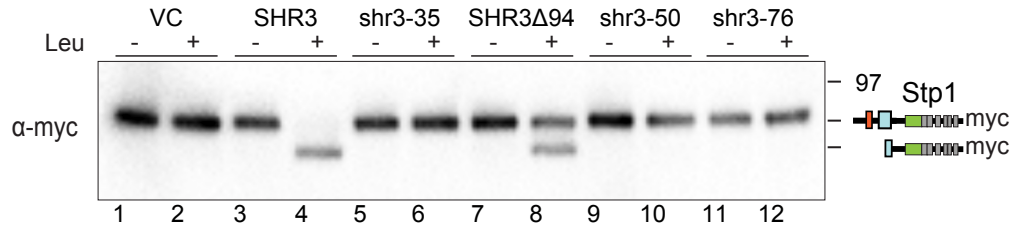

replicate 2 from bn9  
was used to prepare Fig 3C

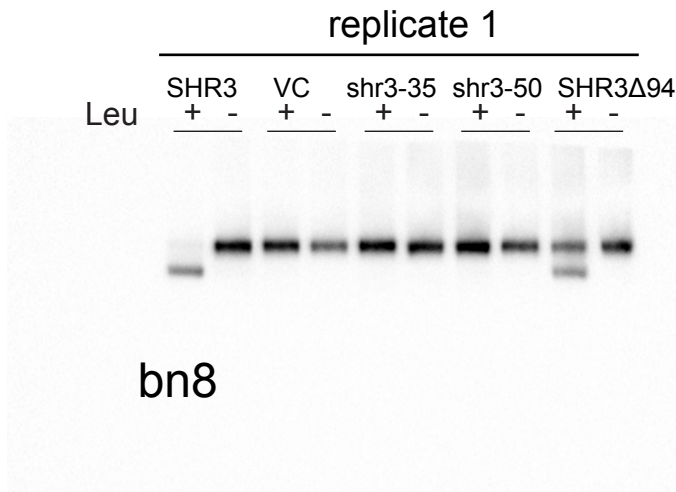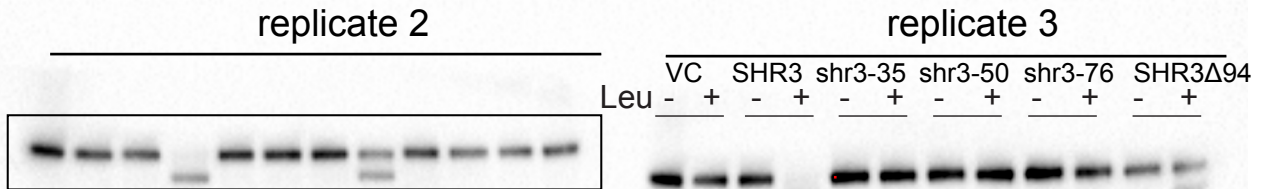

bn9

bn10
