# Supplementary material for: ER-localized Shr3 is a selective co-translational folding chaperone necessary for amino acid permease biogenesis
Source: PubMed Central journal article supplement — J Cell Biol. 2023 Jul 21;222(9):e202208060. doi: 10.1083/jcb.202208060 (PMC10359922; doi:10.1083/jcb.202208060), 2023-07-21

# Raw4

Raw data - 2 blots (bn11-12) with 3 biological and technical replicates to establish validity of split-Ubi signal to monitor interactions between Shr3-NubA, shr3-35-NubA and Shr3Δ94 with Gap1-Cub. Blots developed with α-HA; quantitative data plotted in lower panel Fig. 4D.

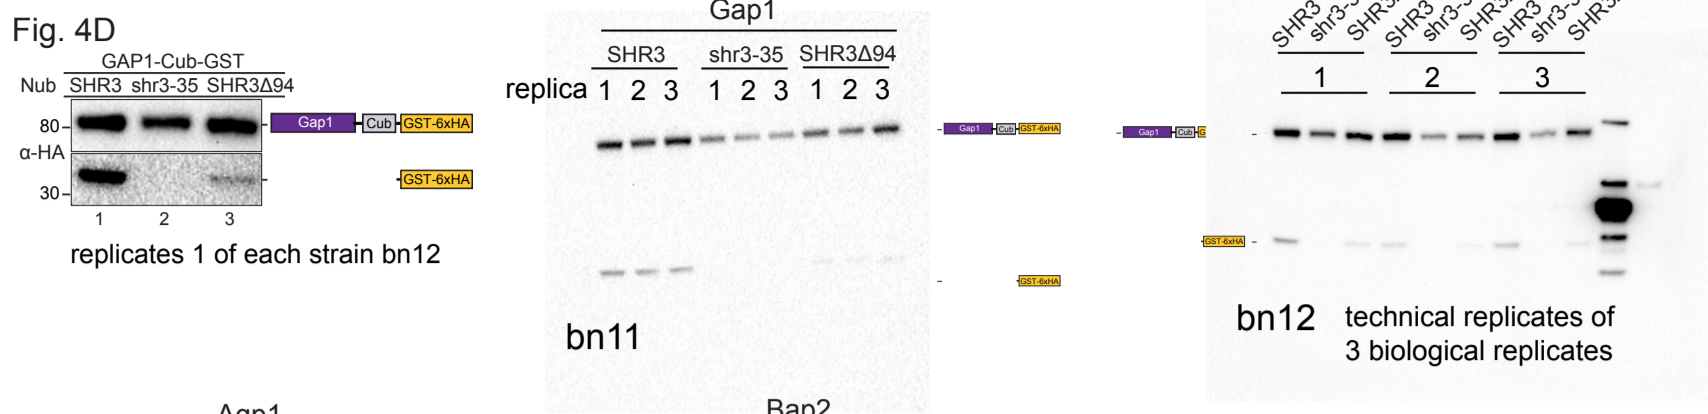

Raw data - 2 blots (bn13-14) with 3 biological replicates to quantitate split-Ubi interactions between Shr3-NubA, shr3-35-NubA and Shr3Δ94 with Agp1-Cub, and Bap2-Cub. Blots developed with α-HA; quantitative data plotted in panels Fig. 4E.

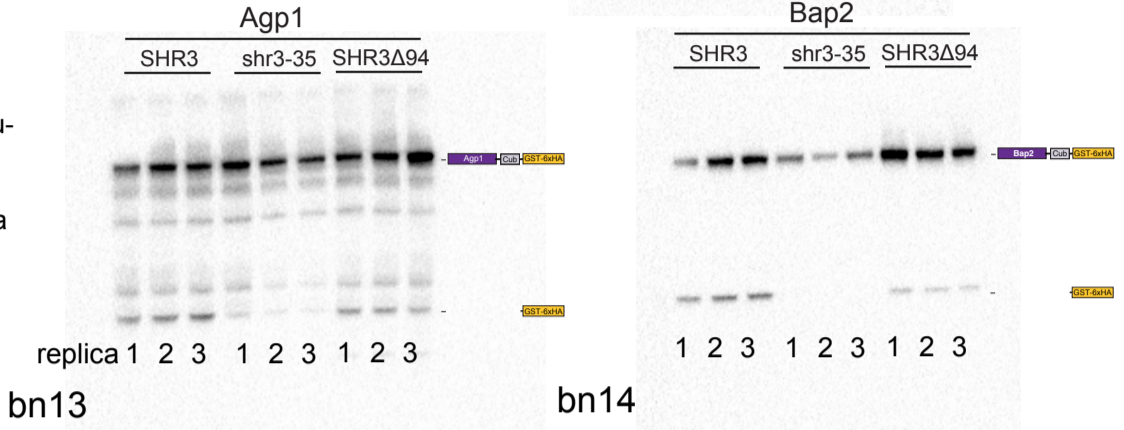

Raw data - 3 blots (bn15-17) with 3 biological replicates to quantitate split-Ubi interactions between Shr3-NubA (1), shr3-35-NubA (2) and Shr3Δ94 (3) with Gnp1-Cub, Lyp1-Cub and Ssy1-Cub. Blots developed with α-HA; quantitative data plotted in panels Fig. 4E, 4F and 4G, respectively.

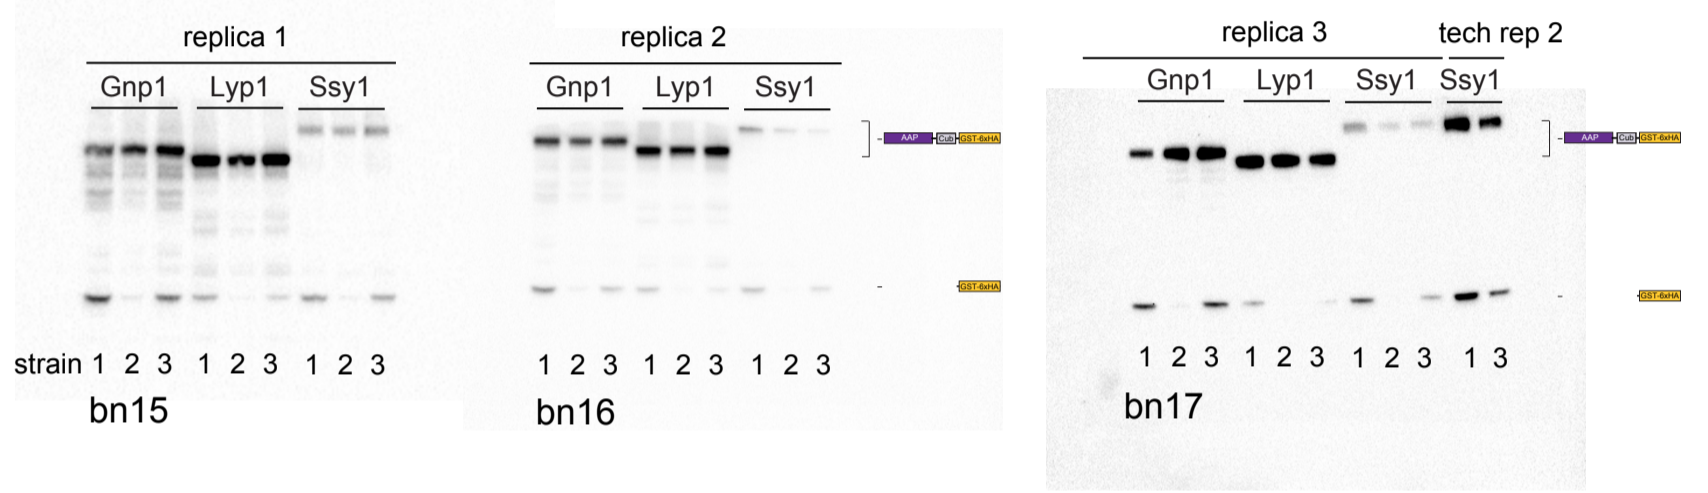

Raw data - 2 blots (bn18-19) with 3 biological replicates to quantitate split-Ubi interactions between Shr3-NubA (1), shr3-35-NubA (2) and Shr3Δ94 (3) with Can1-Cub. Blots developed with α-HA; quantitative data plotted in panel Fig. 4G.

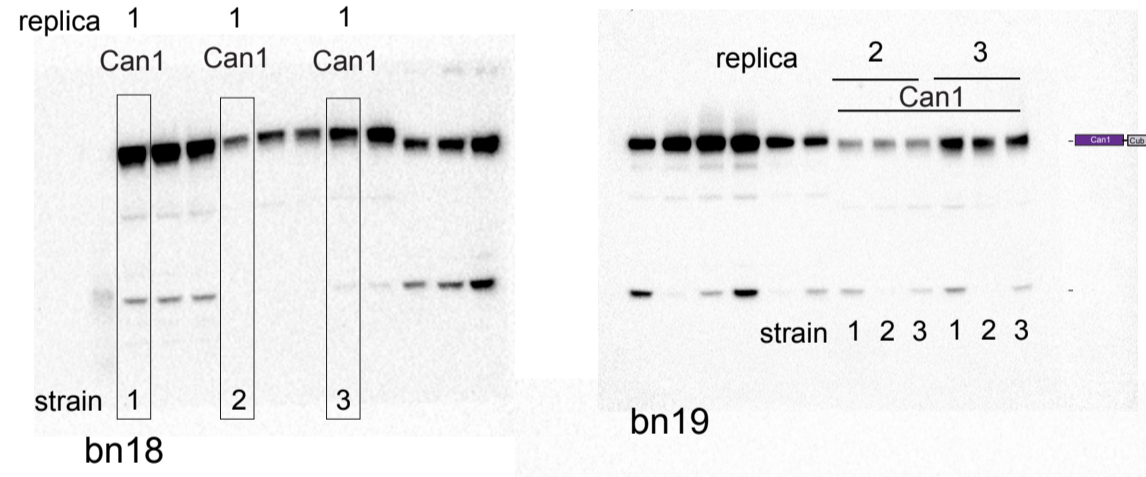

Raw data - 3 blots (bn20-22) with 3 biological replicates to quantitate split-Ubi interactions between Shr3-NubA (1), shr3-35-NubA (2) and Shr3Δ94 (3) with Gap1-Cub and Gal2-Cub. Blots developed with α-HA; quantitative data plotted in panels Fig. 4D and 4H, respectively.

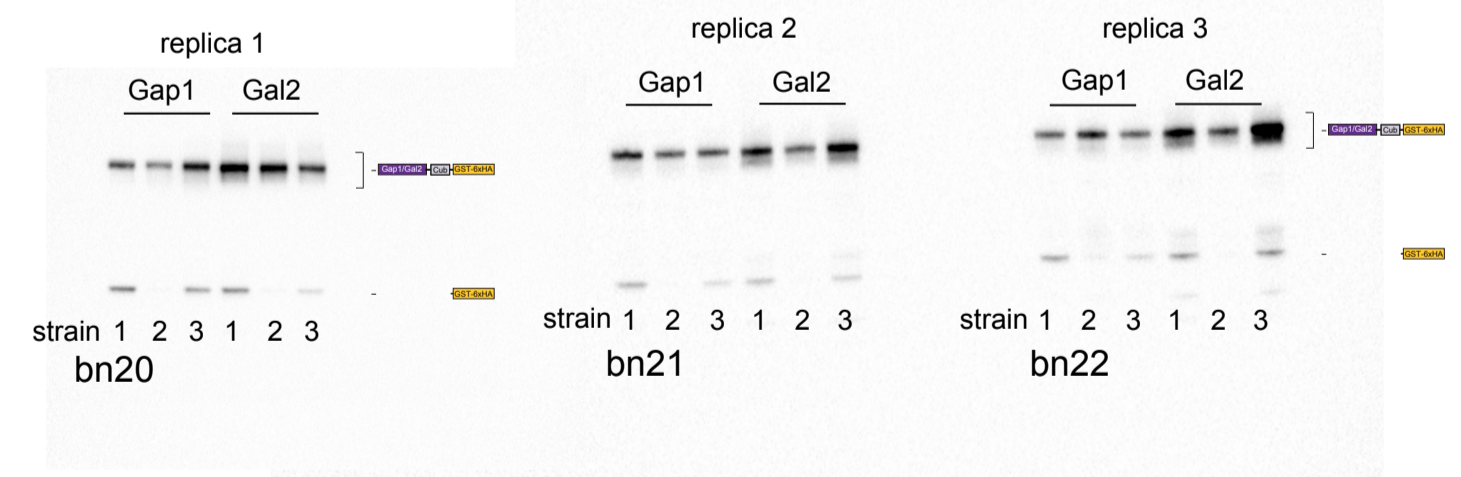

Raw data - 2 blots (bn23-24) with 3 biological and 2 technical replicates to quantitate split-Ubi interactions between Shr3-NubA (1), shr3-35-NubA (2) and Shr3Δ94 (3) with Hxt1-Cub. Blots developed with α-HA; quantitative data plotted in panel Fig. 4H.

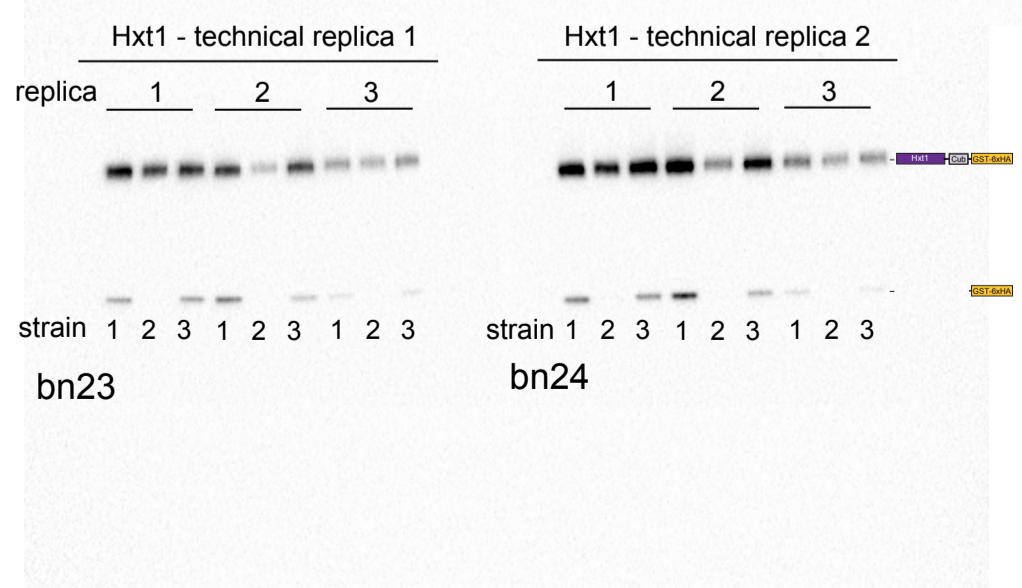

Supplement: JCB_202208060_SourceDataF4.pdf [file JCB_202208060_SourceDataF4.pdf]
