# Supplementary material for: ER-localized Shr3 is a selective co-translational folding chaperone necessary for amino acid permease biogenesis
Source: PubMed Central journal article supplement — J Cell Biol. 2023 Jul 21;222(9):e202208060. doi: 10.1083/jcb.202208060 (PMC10359922; doi:10.1083/jcb.202208060), 2023-07-21
Supplement: JCB_202208060_SourceDataF5.pdf [file JCB_202208060_SourceDataF5.pdf]

# Raw5

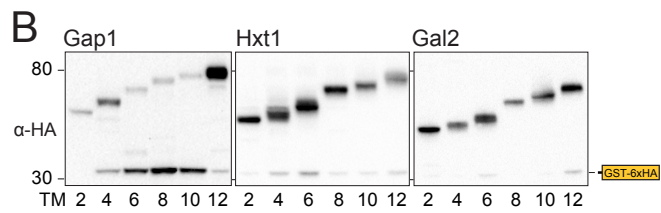

Fig 5B:  
Gap1 (replicate 1, bn28);  
Hxt1 (replicate 3, bn34);  
and Gal2 (replicate 2, bn26)

Gap1-TM1-10 biological replicates 1&2

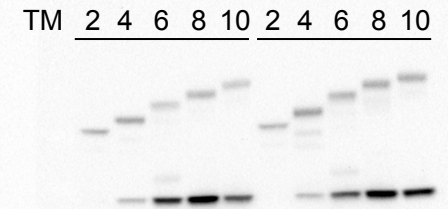

bn30

Gap1-TM1-10 biological replicates 3&4

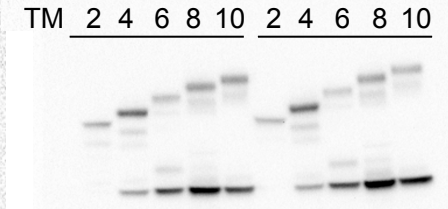

bn31

Hxt1-TM1-12 biological replicate 3

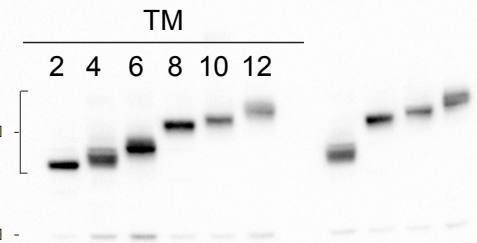

bn34

Gal2-TM1-12 biological replicate 3

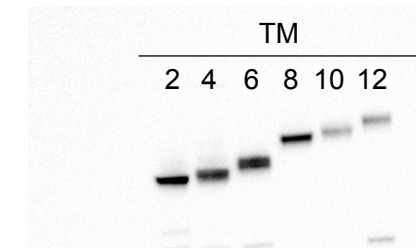

bn27

Gap1-TM1-12 biological replicate 1 (Fig. 5B)

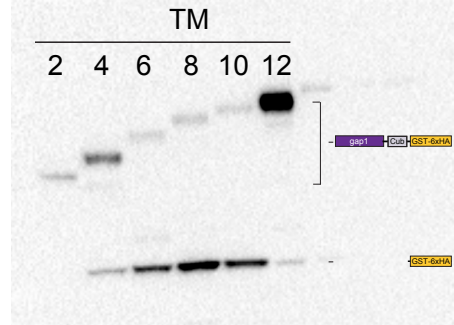

bn28

Hxt1-TM1-12 biological replicate 1

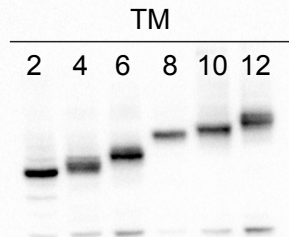

bn32

Gal2-TM1-12 biological replicate 1 (Fig. 6B)

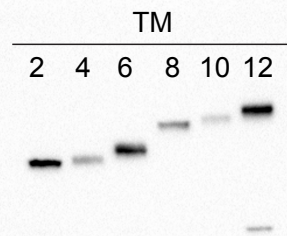

bn25

Gap1-TM10-12 biological replicates 1 and 2

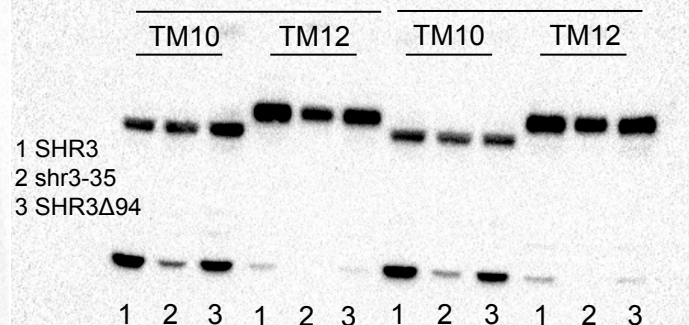

bn29

Hxt1-TM1-12 biological replicate 2

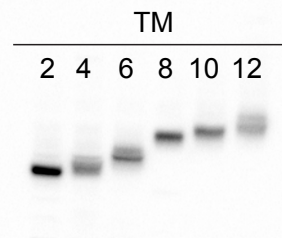

bn33

Gal2-TM1-12 biological replicate 2 (Fig. 5B)

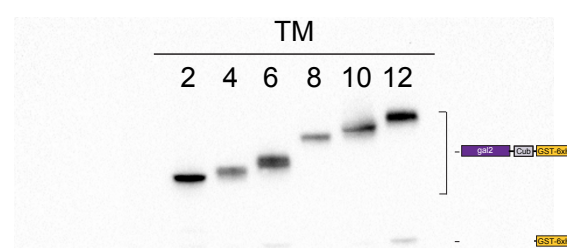

bn26

Raw data - 4 blots (bn28-31) with 3 biological and technical replicates to quantitate split-Ub interactions between Shr3-NubA with truncated Gap1-Cub. Blots developed with  $\alpha$ -HA; quantitative data plotted in Fig. 5C.

Raw data - 3 blots (bn32-34) with 3 biological replicates to quantitate split-Ub interactions between Shr3-NubA with truncated Hxt1-Cub. Blots developed with  $\alpha$ -HA; quantitative data plotted in Fig. 5C.

Raw data - 3 blots (bn25-27) with 3 biological replicates to quantitate split-Ub interactions between Shr3-NubA with truncated Gal2-Cub. Blots developed with  $\alpha$ -HA; quantitative data plotted in Fig. 5C.
