# Supplementary material for: ER-localized Shr3 is a selective co-translational folding chaperone necessary for amino acid permease biogenesis
Source: PubMed Central journal article supplement — J Cell Biol. 2023 Jul 21;222(9):e202208060. doi: 10.1083/jcb.202208060 (PMC10359922; doi:10.1083/jcb.202208060), 2023-07-21

# Raw6

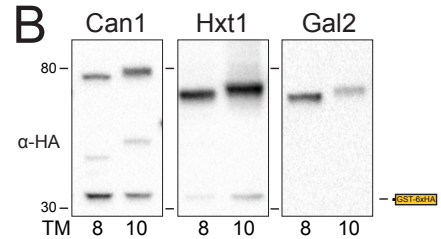

Fig 6B:  
 Can1 (replicate 1, bn52);  
 Hxt1 (replicate 1, bn32);  
 and Gal2 (replicate 1, bn25)

Raw data - 3 blots (bn52-54) with 3 biological replicates to quantitate split-Ub interactions between Shr3-NubA with truncated Can1(TM8 & 10)-Cub; Gap1-Cub truncions were included as contol. Blots developed with  $\alpha$ -HA; quantitative data plotted in Fig. 6C.

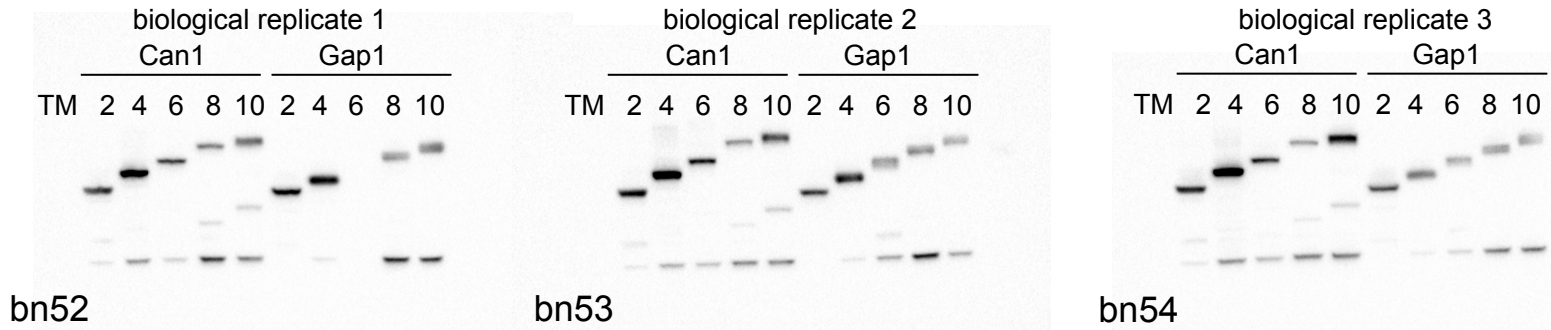

Raw data - 3 blots (bn32-34) with 3 biological replicates to quantitate split-Ub interactions between Shr3-NubA with truncated Hxt1(TM8 & 10)-Cub. Blots developed with  $\alpha$ -HA; quantitative data plotted in Fig. 6C.

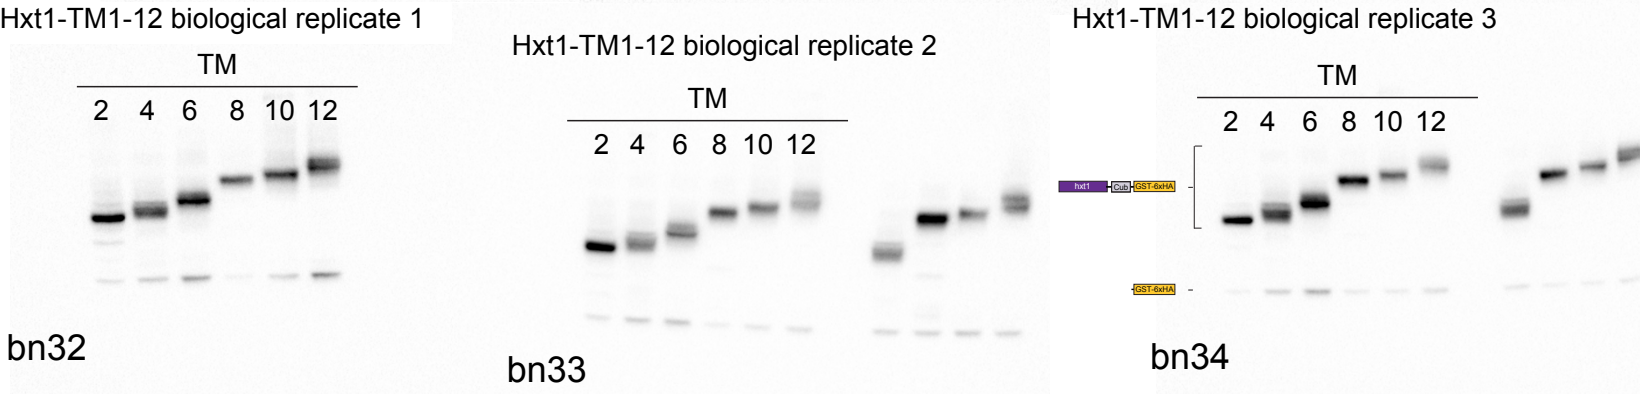

Raw data - 3 blots (bn25-27) with 3 biological replicates to quantitate split-Ub interactions between Shr3-NubA with truncated Gal2(TM8 & 10)-Cub. Blots developed with  $\alpha$ -HA; quantitative data plotted in Fig. 6C.

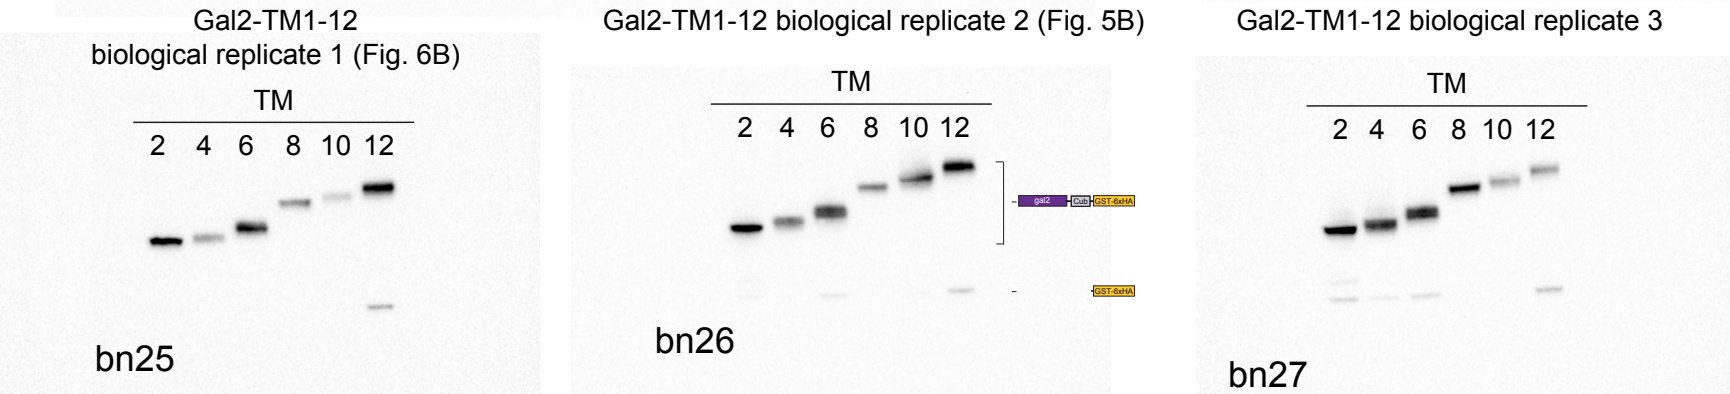

Supplement: JCB_202208060_SourceDataF6.pdf [file JCB_202208060_SourceDataF6.pdf]
