# Supplementary material for: ER-localized Shr3 is a selective co-translational folding chaperone necessary for amino acid permease biogenesis
Source: PubMed Central journal article supplement — J Cell Biol. 2023 Jul 21;222(9):e202208060. doi: 10.1083/jcb.202208060 (PMC10359922; doi:10.1083/jcb.202208060), 2023-07-21

# Raw7A

Raw data - 6 blots (bn35-40) with 3 biological replicates and technical replicates to quantitate split-Ub interactions between Shr3-NubA and Shr3Δ94-NubA with truncated Agp1-Cub constructs. All blots developed with α-HA.

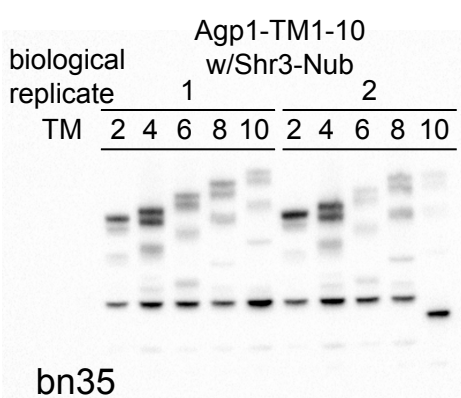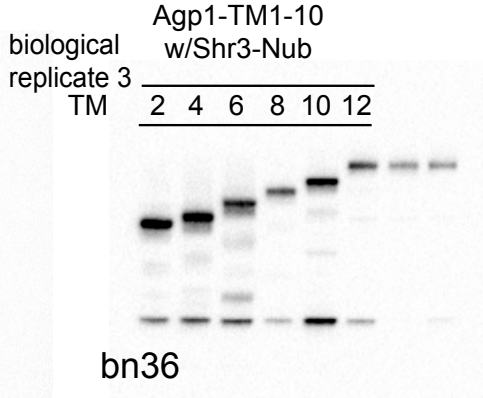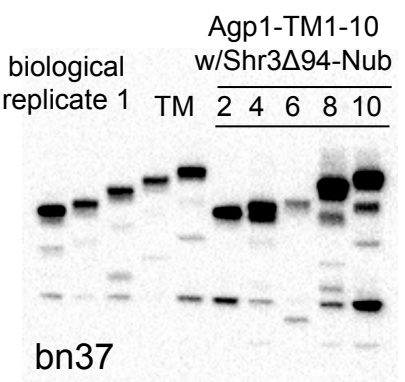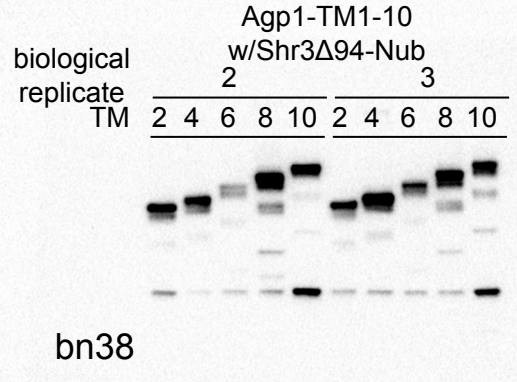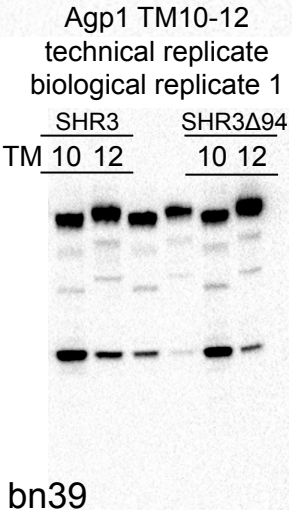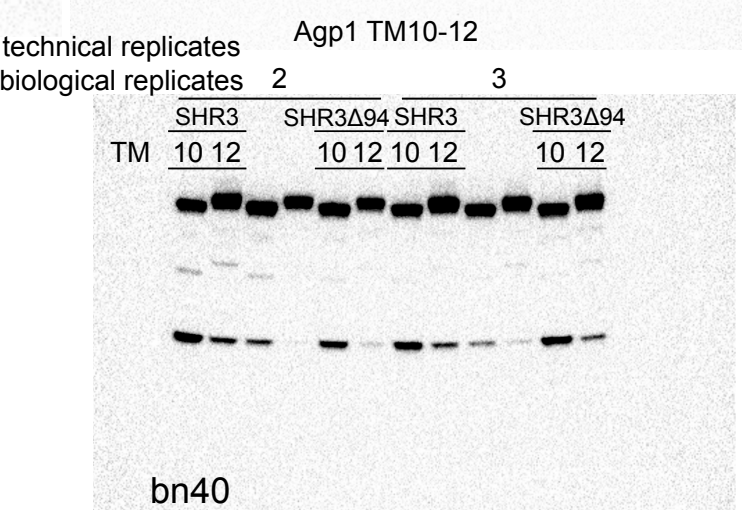

# Raw7B

Raw data - 4 blots (bn41-44) with 3 biological replicates and technical replicate (bioreplicate 3) to quantitate split-Ub interactions between Shr3-NubA and Shr3Δ94-NubA with truncated Ssy1-Cub constructs. All blots developed with α-HA.

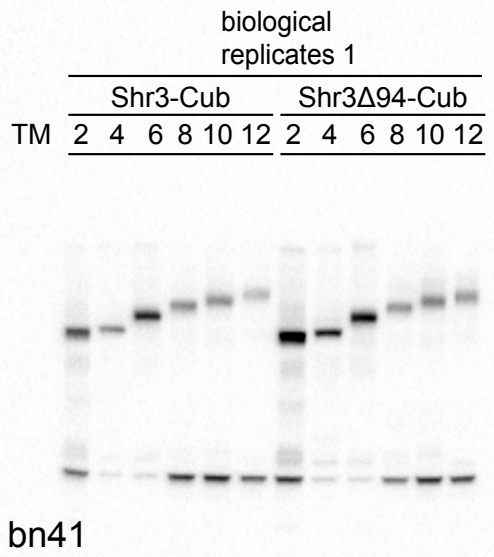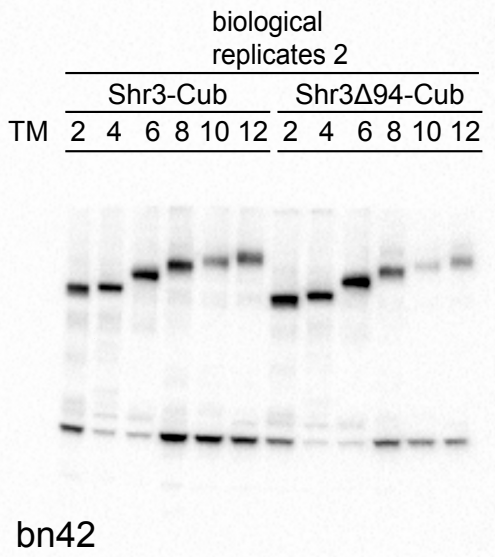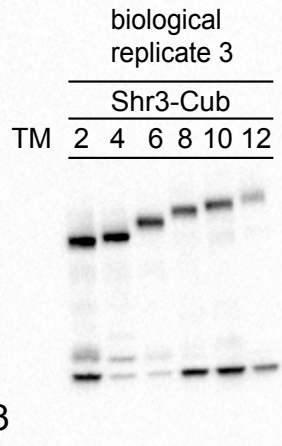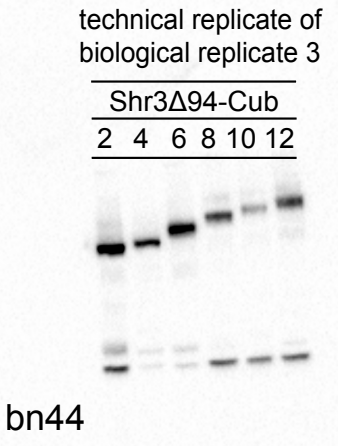

Supplement: JCB_202208060_SourceDataF7.pdf [file JCB_202208060_SourceDataF7.pdf]
