# Supplementary material for: ER-localized Shr3 is a selective co-translational folding chaperone necessary for amino acid permease biogenesis
Source: PubMed Central journal article supplement — J Cell Biol. 2023 Jul 21;222(9):e202208060. doi: 10.1083/jcb.202208060 (PMC10359922; doi:10.1083/jcb.202208060), 2023-07-21

# RawS4

Raw data - 1 blot (bn45) with 3 biological replicates

Effect of ER exit motif mutations on Shr3-AAP interactions.

split Ub: *SHR3-Cub* and *GAP1* & *gap1-ERX*; *SSY1* & *ssy1-ERX*

biological replicates 1, 2 & 3

blot developed with  $\alpha$ -HA

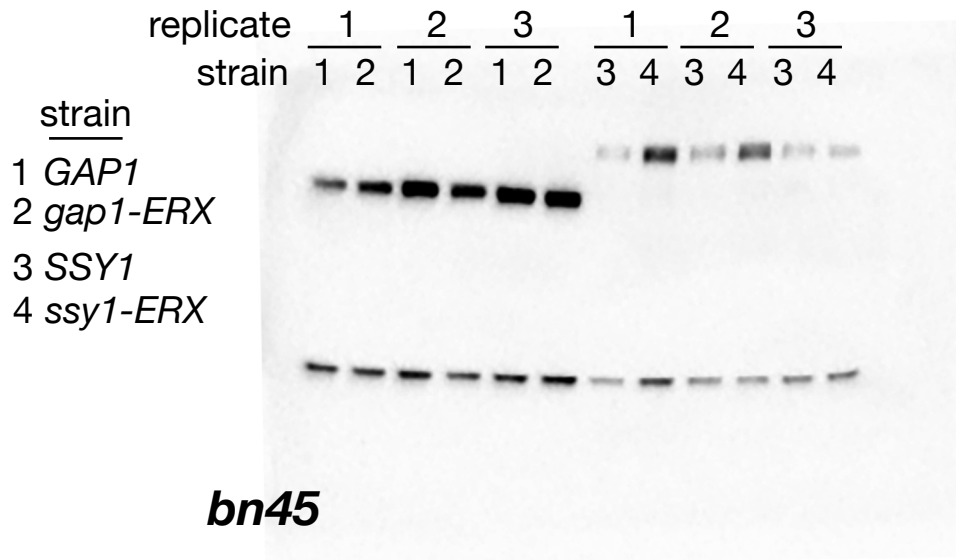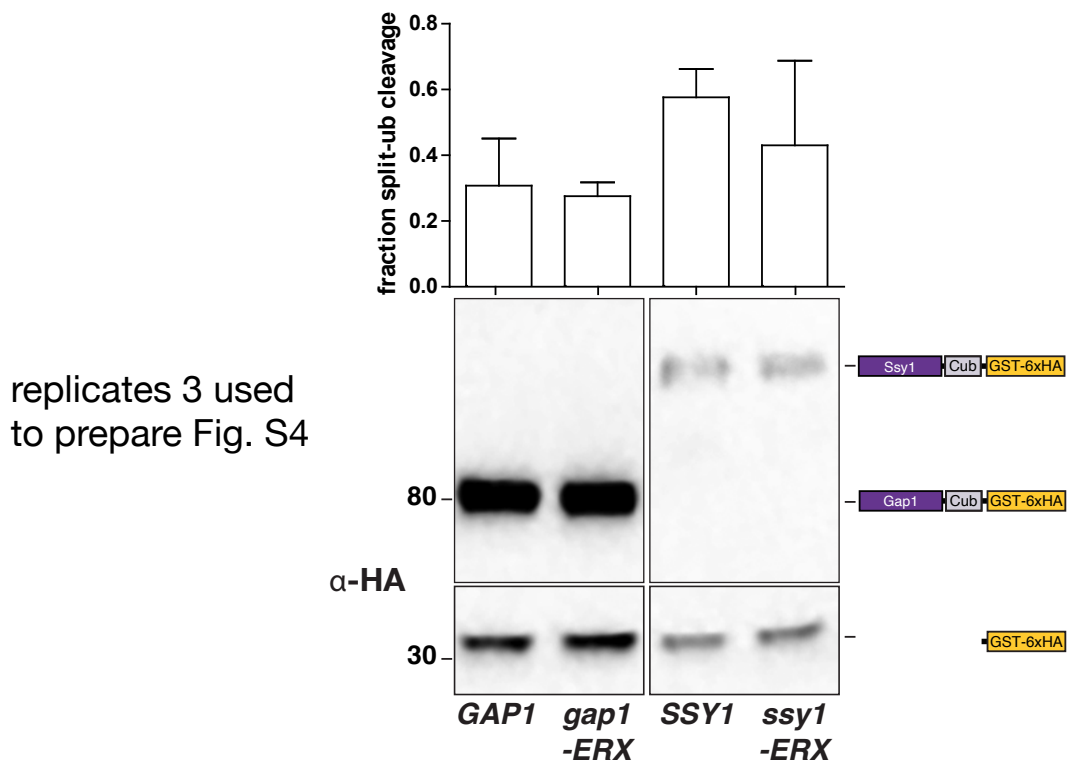

Supplement: JCB_202208060_SourceDataFS4.pdf [file JCB_202208060_SourceDataFS4.pdf]
